# Supplementary material for: Oil gland and oil pores in billfishes: in search of a function
Source: Oxford University Press journal article supplement (doi:10.1242/jeb.224956), 2020-01-01
Supplement: jeb224956supp.pdf [file jeb224956supp.pdf]

Table S1. Pore extension for the four billfish species

[Click here to Download Table S1](#)

Table S2. Pore density and size for the four billfish species

[Click here to Download Table S2](#)
